# Supplementary material for: Association of Inflammatory Biomarkers with Subclinical Cardiac Dysfunction in Inflammatory Bowel Disease: Roles of NLR, PLR, CRP/Alb, and MPV
Source: Research Square preprint supplement (doi:10.21203/rs.3.rs-8244067/v1), 2026-02-11
Supplement: Supplementary file 1 [file bb403ef1069740c97fcf454a.docx]

**Questionnaire**

**Patient personal information:**

Name and Family name: ……………………National code: …………………

Gender: Male⃝ Female⃝

Medical record number: ……………….. Age (Year):…………Hight (CM):……….

Weight (Kg): ……………..Phone number: ………………….

**Medical history:**

Smoking: Yes ⃝ No ⃝ Alcohol use: Yes ⃝ No ⃝ Drug use: Yes ⃝ No ⃝

DM ⃝ CKD ⃝ CAD ⃝ HTN ⃝

**Type of disease:**

Ulcerative colitis ⃝ Crohn ⃝

History of hospitalization: Yes ⃝ No ⃝

History of relapse: Yes ⃝ No ⃝

Other medical history:

**Drug history:**

1- Cortisone (type/dose):

Cinnora ⃝ Anti TNFα ⃝ Remicade ⃝

2- Thiopurine:

6MP ⃝ Azathioprine ⃝

3- 5ASA

Solphasalazin ⃝ Mezalazin ⃝ Enema ⃝

4. MTX

5- NSAID

6- Other drugs:

**Clinical findings:**

T: …………….HR: ……………..BP: ………………

**Number of bowel movements per day:**

Bleeding rate: Light ⃝ Moderate ⃝ Only blood ⃝

**Extra-intestinal complications:**

Kidney stones ⃝ AS ⃝ PSC ⃝

Others:

**Colonoscopy findings:**

Rectosigmoditis ⃝ Proctitis ⃝ Extensive ⃝ Pancolitiis ⃝ Left side ⃝

**Laboratory findings:**

| WBC | TG | BIL-T |
| --- | --- | --- |
| Hb | Chol | BIL-D |
| MCV | LDL | BUN |
| PLT | HDL | CR |
| ESR | CRP | ALB |
| FBS | Ferritin | ALT |
| S/E-WBC | AST | S/E-RBC |
|  | Calprotectin | ALP |

**Cardiac findings:**

| Heart Rate: |
| --- |
| Rhythm: |
| PR interval: |
| QT interval: |
| QT dispersion: |

**Echocardiographic findings:**

| LV EF: |
| --- |
| Volume index: |
| PAP: |
| LV end diastolic volume index: |
| E/e: |
| LVH: |
| LA: |
| LV Longitudinal strain: |
